# Supplementary material
Source: PubMed Central journal article supplement (PMC6439753)

## Supplementary Online Content

Rauch SAM, Kim HM, Powell C, et al. Efficacy of prolonged exposure therapy, sertraline hydrochloride, and their combination among combat veterans with posttraumatic stress disorder: a randomized clinical trial. *JAMA Psychiatry*. Published online December 5, 2018. doi:10.1001/jamapsychiatry.2017.3412

**eFigure.** Means of PCL-S Showing Change in PTSD Over Treatment by Study Arm

This supplementary material has been provided by the authors to give readers additional information about their work.

**eFigure.** Means of PCL-S Showing Change in PTSD Over Treatment by Study Arm

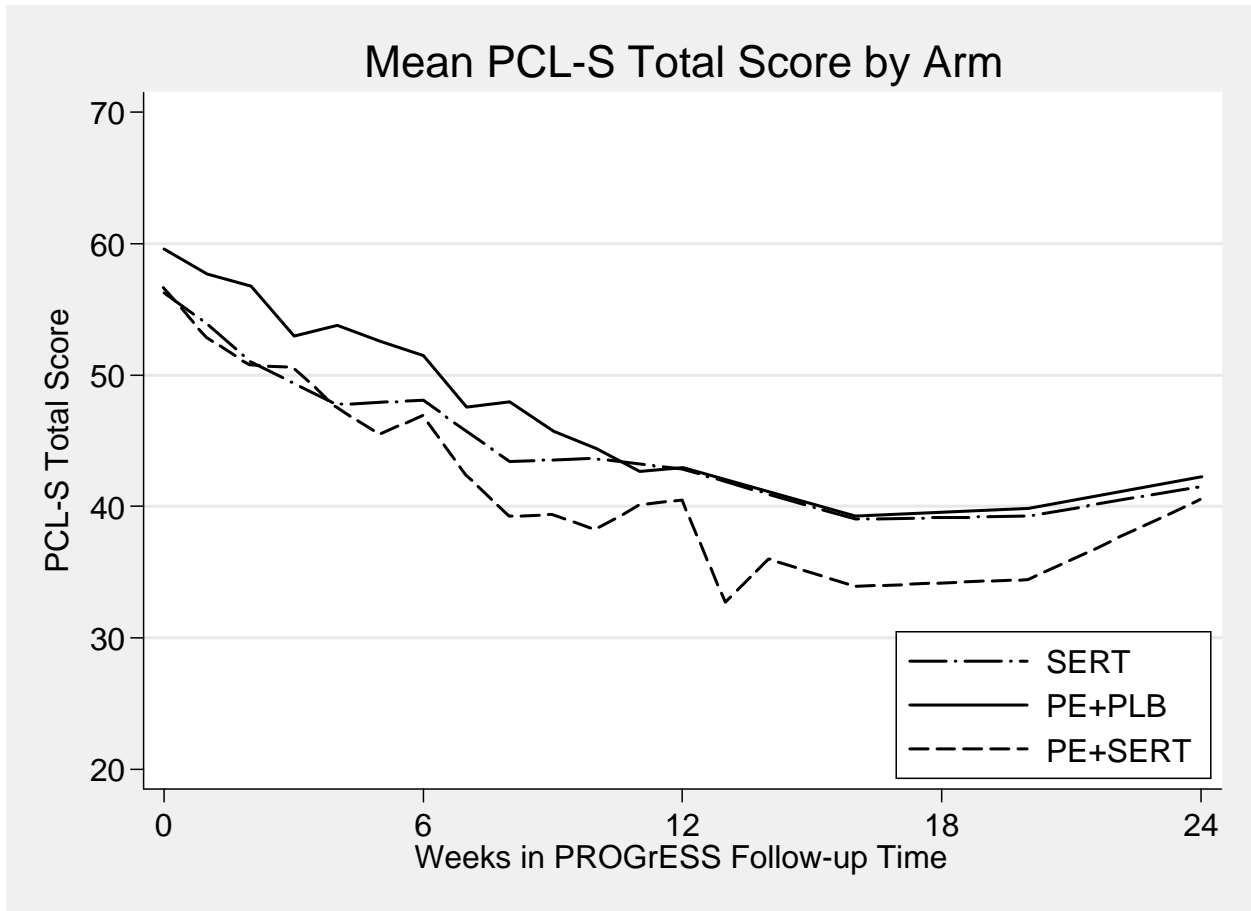

Supplement: jamapsychiatry-76-117-s002.pdf [file jamapsychiatry-76-117-s002.pdf]
