# Supplementary material
Source: PubMed Central journal article supplement (PMC6439753)
Supplement: jamapsychiatry-76-117-s003.pdf [file jamapsychiatry-76-117-s003.pdf]

## **Data Sharing Statement**

### **Data**

**Data available:** Yes

**Data types:** Deidentified participant data, Data dictionary

**How to access data:** This will not occur until after the primary statement of work studies are completed and the method for access will be determined at that time consistent with DOD and VA requirements.

**When available:** beginning date: 01-01-2019

### **Supporting Documents**

**Document types:** None

### **Additional Information**

**Who can access the data:** researchers whose proposed use of the data has been approved

**Types of analyses:** for a specified purpose

**Mechanisms of data availability:** after approval of a proposal and in accordance with regulatory requirements
